# Supplementary material
Source: publisher figshare collection journal article supplement (https://gsajournals.figshare.com/articles/dataset/_/8020115)
Supplement: Supplementary file 1 [file 1]

| **Table S1. Expression patterns of 79 GeneSwitch lines expressed in the ovary.** | | |
| --- | --- | --- |
|  | **Line number** | **Expression Pattern** |
| 1 | 291 | Follicle cells of stage 7-9 egg chambers |
| 2 | 1655 | Posterior follicle cells of stage 9 egg chambers |
| 3 | 1665 | Posterior follicle cells of stage 9 egg chambers |
| 4 | 1667 | Posterior follicle cells of stage 9 egg chambers |
| 5 | 1669 | Posterior follicle cells of stage 9 egg chambers |
| 6 | 1670 | Posterior follicle cells of stage 9 egg chambers |
| 7 | 1671 | Posterior follicle cells of stage 9 egg chambers |
| 8 | 1673 | Posterior follicle cells of stage 9 egg chambers |
| 9 | 1677 | Posterior follicle cells of stage 9 egg chambers |
| 10 | 1678 | Posterior follicle cells of stage 9 egg chambers |
| 11 | 1679 | Posterior follicle cells of stage 9 egg chambers |
| 12 | 1680 | Posterior follicle cells of stage 9 egg chambers |
| 13 | 1682 | Posterior follicle cells of stage 9 egg chambers |
| 14 | 1683 | Posterior follicle cells of stage 9 egg chambers |
| 15 | 1685 | Posterior follicle cells of stage 9 egg chambers |
| 16 | 1687 | Posterior follicle cells of stage 9 egg chambers |
| 17 | 1688 | Posterior follicle cells of stage 9 egg chambers |
| 18 | 1689 | Posterior follicle cells of stage 9 egg chambers |
| 19 | 1690 | Posterior follicle cells of stage 9 egg chambers |
| 20 | 1694 | Posterior follicle cells of stage 9 egg chambers |
| 21 | 1695 | Posterior follicle cells of stage 9 egg chambers |
| 22 | 1696 | Posterior follicle cells of stage 9 egg chambers |
| 23 | 1700 | Posterior follicle cells of stage 9 egg chambers |
| 24 | 1711 | Anterior follicle cells of stage 9 egg chambers |
| 25 | 1717 | Posterior follicle cells of stage 9 egg chambers |
| 26 | 1718 | Follicle cells of stage 9 egg chambers |
| 27 | 1734 | Anterior follicle cells of stage 9 egg chambers |
| 28 | 1735 | Anterior follicle cells of stage 9 egg chambers |
| 29 | 1738 | Anterior follicle cells of stage 9 egg chambers |
| 30 | 1739 | Anterior follicle cells of stage 9 egg chambers |
| 31 | 1743 | Anterior follicle cells of stage 9 egg chambers |
| 32 | 1748 | Anterior follicle cells of stage 9 egg chambers |
| 33 | 1749 | Anterior follicle cells of stage 9 egg chambers |
| 34 | 1754 | Anterior follicle cells of stage 9 egg chambers |
| 35 | 1757 | Anterior follicle cells of stage 9 egg chambers |
| 36 | 1758 | Anterior follicle cells of stage 9 egg chambers |
| 37 | 1759 | Anterior follicle cells of stage 9 egg chambers |
| 38 | 1760 | Anterior follicle cells of stage 9 egg chambers |
| 39 | 1761 | Anterior follicle cells of stage 9 egg chambers |
| 40 | 1763 | Anterior follicle cells of stage 9 egg chambers |
| 41 | 1764 | Anterior follicle cells of stage 9 egg chambers |
| 42 | 1765 | Anterior follicle cells of stage 9 egg chambers |
| 43 | 1766 | Anterior follicle cells of stage 9 egg chambers |
| 44 | 1768 | Anterior follicle cells of stage 9 egg chambers |
| 45 | 1769 | Anterior follicle cells of stage 9 egg chambers |
| 46 | 1770 | Anterior follicle cells of stage 9 egg chambers |
| 47 | 1771 | Anterior follicle cells of stage 9 egg chambers |
| 48 | 1772 | Anterior follicle cells of stage 9 egg chambers |
| 49 | 1774 | Cap cells/follicle cells of every egg chambers |
| 50 | 1797 | Posterior follicle cells of stage 9 egg chambers |
| 51 | 1812 | Posterior follicle cells of stage 9 egg chambers |
| 52 | 1827 | Follicle cells of stage 6-9 egg chambers |
| 53 | 1854 | Follicle cells of stage 7-9 egg chambers |
| 54 | 1857 | Polar cells |
| 55 | 1894 | Anterior follicle cells of stage 7 egg chamber and follicle cells of 8-9 egg chambers |
| 56 | 1895 | Follicle cells of egg chambers after stage 8 |
| 57 | 1925 | Posterior follicle cells of stage 9 egg chambers |
| 58 | 1938 | Posterior follicle cells of stage 9 egg chambers |
| 59 | 1946 | Posterior follicle cells of stage 9 egg chambers |
| 60 | 1967 | Follicle cells of stage 8-9 egg chambers |
| 61 | 1971 | Follicle cells of stage 9 egg chambers |
| 62 | 1979 | Posterior follicle cells of stage 9 egg chambers |
| 63 | 1987 | Posterior follicle cells of stage 9 egg chambers |
| 64 | 1989 | Follicle cells of stage 8 and 9 egg chambers |
| 65 | 2056 | Anterior follicle cells of stage 9 egg chambers |
| 66 | 2057 | Follicle cells of egg chambers before stage 6 egg chambers |
| 67 | 2112 | Cap cells/ terminal filament cells |
| 68 | 2126 | Escort cells |
| 69 | 2128 | Posterior follicle cells of stage 8-9 egg chambers |
| 70 | 2130 | Follicle cells of stage 9 egg chambers |
| 71 | 2134 | Posterior follicle cells of stage 9 egg chambers |
| 72 | 2144 | Posterior follicle cells of stage 9 egg chambers |
| 73 | 2160 | Follicle cells of egg chambers after stage 6 |
| 74 | 2176 | Follicle cells of stage 9 egg chambers |
| 75 | 2198 | Polar cells |
| 76 | 2261 | Cap cells/Anterior Follicle cells of stage 8-9 egg chambers/weak in the germline |
| 77 | 2298 | Polar cells |
| 78 | 2305 | Cap cells/Follicle cells |
| 79 | 2312 | Escort cells |
